# Supplementary material
Source: publisher site journal article supplement (https://www.spandidos-publications.com/2520/downloadSupplementary)
Supplement: Supplementary file 1 [file downloadSupplementary]

## Sheet: lncRNAs in stomach, AM vs. NC
Probe name	P-value (Corr)	P-value	FC (abs)	Regulation	GeneID	Gene symbol
gi|755532756|ref|XR_871427.1|	0.437473	0.000732058	5.51216	up	105245099	LOC105245099
ri|B930034F23|PX00163P06|2733	0.604617	0.0170999	4.05904	up	NA	NA
NONMMUT003207	0.623406	0.0462051	4.05658	up	NONMMUG002080.2	NA
ri|2700078F24|ZX00056H20|1368	0.547131	0.00354351	3.17094	up	NA	NA
gi|755528033|ref|XR_879317.1|	0.597624	0.0146842	3.04094	up	105243318	LOC105243318
NONMMUT033924	0.604617	0.0166147	2.80501	up	NONMMUG020843.2	NA
ri|5830470F21|PX00645F20|2544	0.623406	0.0463716	2.69522	up	NA	NA
SNHG3_NR_003270.2	0.583892	0.00952729	2.66448	up	NA	NA
NONMMUT005919	0.604617	0.0221215	2.58216	up	NONMMUG003822.1	NA
NONMMUT006946	0.604617	0.0222573	2.40337	up	NONMMUG004468.2	NA
gi|755491194|ref|XR_406547.2|	0.571361	0.00633283	2.39481	up	102635381	Gm32738
NONMMUT065379	0.622243	0.0315064	2.37092	up	NONMMUG040428.1	NA
NONMMUT031786	0.594314	0.0135868	2.36199	up	NONMMUG019543.2	NA
NONMMUT046055	0.623406	0.03482	2.35463	up	NONMMUG028432.2	NA
NONMMUT049854	0.604617	0.0190184	2.33302	up	NONMMUG030867.2	Snhg3
NONMMUT029843	0.547131	0.00337859	2.26836	up	NONMMUG018443.1	NA
ri|A330077P12|PX00133C18|1019	0.604617	0.0208921	2.24707	up	NA	NA
gi|568898563|ref|XR_394319.1|	0.503622	0.00197031	2.19088	up	102642954	LOC102642954
NONMMUT050028	0.622243	0.0321442	2.16719	up	NONMMUG030980.1	NA
NONMMUT070948	0.412772	0.000523581	2.16598	up	NONMMUG043936.1	NA
ri|6030401E18|PX00056C13|3425	0.604617	0.0193016	2.15075	up	NA	NA
NONMMUT029925	0.604617	0.0173343	2.11937	up	NONMMUG018488.2	NA
NONMMUT028790	0.623406	0.0376601	2.09381	up	NONMMUG017807.1	NA
NONMMUT063941	0.594314	0.0129655	2.06522	up	NONMMUG039467.2	NA
ri|D030011M09|PX00179K16|3152	0.604678	0.0231027	2.04954	up	NA	NA
ri|7420414G23|PX00708K05|1713	0.623406	0.0373323	2.03764	up	NA	NA
gi|755532573|ref|XR_380015.2|	0.616852	0.0293951	2.03148	up	102637975	Gm34655
NONMMUT025425	0.604617	0.0179913	2.02483	up	NONMMUG015741.2	NA
NONMMUT046417	0.541725	0.00315032	1.99682	up	NONMMUG028671.2	Gm11880
NONMMUT049853	0.437473	0.000786209	1.99241	up	NONMMUG030867.2	Snhg3
NONMMUT051432	0.604617	0.0198659	1.98728	up	NONMMUG031902.2	Gm16113
NONMMUT067421	0.469665	0.00119149	1.96647	up	NONMMUG041751.2	NA
ri|B930021M05|PX00744L15|2067	0.547131	0.00335771	1.952	up	NA	NA
ri|8030488J09|PX00104N17|974	0.58482	0.00966232	1.94461	up	NA	NA
NONMMUT044299	0.623406	0.0377425	1.9353	up	NONMMUG027334.1	NA
NONMMUT074466	0.604617	0.0196263	1.93179	up	NONMMUG046181.1	NA
NONMMUT025430	0.623406	0.0364	1.92672	up	NONMMUG015741.2	NA
ri|I920164A13|PL00170F14|1787	0.604617	0.0215762	1.92614	up	NA	NA
ri|2210411K19|ZX00054I19|524	0.574703	0.00837434	1.91894	up	NA	NA
ri|E330028O17|PX00689G08|1876	0.623406	0.0469968	1.91002	up	NA	NA
NONMMUT011557	0.58683	0.00992301	1.8949	up	NONMMUG007308.2	NA
NONMMUT020083	0.623406	0.0382183	1.89349	up	NONMMUG012454.2	NA
NONMMUT008737	0.623406	0.0373018	1.89342	up	NONMMUG005404.2	Gm12029
ri|A130003N20|PX00121A01|2389	0.604617	0.0216471	1.89232	up	NA	NA
NONMMUT009821	0.571411	0.00735583	1.88741	up	NONMMUG006155.2	NA
ri|F630031J06|PL00014L22|2657	0.605468	0.024183	1.8697	up	NA	NA
NONMMUT011439	0.58683	0.00992898	1.86729	up	NONMMUG007229.2	NA
NONMMUT004581	0.611161	0.0282876	1.86382	up	NONMMUG002947.2	NA
NONMMUT065888	0.604617	0.0204564	1.85432	up	NONMMUG040766.2	Gm15654
ri|D330041E07|PX00192N11|3089	0.594314	0.0120938	1.84842	up	NA	NA
ri|4921538P16|PX00639E11|2316	0.608569	0.0271164	6.42817	down	NA	NA
NONMMUT019547	0.623406	0.0434409	6.23176	down	NONMMUG012135.2	RP24-243P7.7
ri|5033421C21|PX00037D12|1317	0.619665	0.0303509	5.53324	down	NA	NA
ri|F830212M01|PL00023B15|3221	0.623406	0.0379446	4.88596	down	NA	NA
gi|755547201|ref|XR_874120.1|	0.617797	0.030125	4.81546	down	105245664	LOC105245664
gi|755490996|ref|XR_406753.2|	0.604617	0.0165033	4.75595	down	102642951	LOC102642951
NONMMUT050515	0.623406	0.0366368	4.66918	down	NONMMUG031299.1	NA
ri|D030067L12|PX00181K23|1985	0.623406	0.0423991	4.5827	down	NA	NA
NONMMUT050509	0.623406	0.0437737	4.52641	down	NONMMUG031295.2	NA
NONMMUT021256	0.594314	0.0130427	4.24667	down	NONMMUG013187.2	NA
gi|755547329|ref|XR_874185.1|	0.611161	0.0281981	4.2324	down	105245676	LOC105245676
NONMMUT073796	0.604678	0.0231949	4.0631	down	NONMMUG045761.2	Gm14950
ri|6720430M22|PX00059A20|2533	0.604027	0.0158397	4.05665	down	NA	NA
gi|755491054|ref|XR_864904.1|	0.623406	0.035727	3.98154	down	102641903	LOC102641903
NONMMUT025186	0.623406	0.0341576	3.77977	down	NONMMUG015587.2	NA
NONMMUT050531	0.623406	0.0405082	3.70025	down	NONMMUG031307.1	NA
gi|568989581|ref|XR_383389.1|	0.597624	0.0146811	3.48128	down	102637183	Gm34060
ENSMUST00000188613	0.393783	0.000144118	3.47073	down	ENSMUSG00000100896	Gm28217
NONMMUT057158	0.623406	0.039995	3.46669	down	NONMMUG035476.2	NA
ri|E230030L05|PX00210D09|3280	0.623406	0.0496946	3.42826	down	NA	NA
ri|2610027H17|ZX00034A03|462	0.617063	0.0298903	3.30109	down	NA	NA
ENSMUST00000180968	0.623406	0.0342134	3.22803	down	ENSMUSG00000097661	Gm26763
ri|A530069H21|PX00142E16|4365	0.555187	0.00459593	3.15808	down	NA	NA
NONMMUT050454	0.556758	0.00475094	3.13424	down	NONMMUG031258.2	Gm13120
ENSMUST00000181199	0.623406	0.0482273	3.08081	down	ENSMUSG00000096958	Gm26573
NONMMUT063433	0.594314	0.0137925	3.07857	down	NONMMUG039173.2	NA
gi|545746448|ref|NR_104276.1|	0.615272	0.0289795	3.06755	down	66479	1700029F12Rik
NONMMUT013553	0.623406	0.0385371	3.0612	down	NONMMUG008595.2	NA
gi|755491217|ref|XR_406711.2|	0.623406	0.037918	2.93696	down	102642664	LOC102642664
gi|755485538|ref|XR_874363.1|	0.623406	0.0369371	2.92206	down	102640372	Gm36445
NONMMUT057134	0.623406	0.0477695	2.91374	down	NONMMUG035461.2	NA
ri|B230033G16|PX00328J08|718	0.623406	0.0491747	2.86664	down	NA	NA
NONMMUT006320	0.617063	0.0298176	2.8648	down	NONMMUG004066.1	NA
ri|C130087D21|PX00172M21|1788	0.519126	0.0023662	2.8466	down	NA	NA
gi|568892973|ref|XR_403364.1|	0.60815	0.0260647	2.82261	down	102642825	LOC102642825
ri|F830003G17|PL00004G06|3181	0.623406	0.0465885	2.81506	down	NA	NA
NONMMUT009354	0.623406	0.0491311	2.79085	down	NONMMUG005825.2	Gm12139
ENSMUST00000127001	0.611161	0.0285851	2.71439	down	ENSMUSG00000073164	2410018L13Rik
NONMMUT017894	0.623406	0.044611	2.71049	down	NONMMUG011203.2	NA
NONMMUT071623	0.623406	0.0463883	2.69055	down	NONMMUG044365.1	NA
gi|755565830|ref|XR_878111.1|	0.604617	0.0183787	2.6612	down	102642677	LOC102642677
NONMMUT056846	0.623406	0.0461368	2.64874	down	NONMMUG035282.2	NA
ri|6820449M23|PX00705B10|1617	0.623406	0.0434433	2.64514	down	NA	NA
NONMMUT029567	0.571411	0.0078399	2.641	down	NONMMUG018278.2	Gm20523
gi|755488825|ref|XR_883619.1|	0.623406	0.0407955	2.59322	down	414073	BC040756
gi|755491433|ref|XR_406525.2|	0.622243	0.0327073	2.58388	down	102641502	LOC102641502
NONMMUT042367	0.61075	0.0281007	2.55005	down	NONMMUG026249.2	NA
gi|755554381|ref|XR_875918.1|	0.606719	0.0250643	2.54915	down	102642616	LOC102642616
NONMMUT050549	0.623406	0.0395434	2.50936	down	NONMMUG031320.2	NA
gi|755544556|ref|XR_873218.1|	0.623406	0.0434022	2.50057	down	619715	Gm6093

## Sheet: lncRNAs in stomach, H-CP vs. AM
Probe name	P-value (Corr)	P-value	FC (abs)	Regulation	GeneID	Gene symbol
ri|1810010M01|R000022A12|250	0.252661	0.025399	152.2	up	NA	NA
NONMMUT061187	0.162892	0.00519906	6.21885	up	NONMMUG037997.2	0610005C13Rik
NONMMUT029599	0.310473	0.049723	5.64105	up	NONMMUG018303.2	NA
gi|755488696|ref|XR_397428.2|	0.202036	0.012199	5.5157	up	102633711	Gm15320
NONMMUT072927	0.164448	0.00559615	5.50348	up	NONMMUG045195.2	NA
NONMMUT029145	0.130637	0.00197088	5.47783	up	NONMMUG018023.1	NA
gi|755501095|ref|XR_866447.1|	0.129651	0.00170116	5.16934	up	102642297	LOC102642297
gi|755559720|ref|XR_385552.2|	0.212411	0.0154877	5.01286	up	102633711	Gm15320
NONMMUT054809	0.244738	0.0233201	4.10287	up	NONMMUG034003.2	2010001M06Rik
ri|B230307C02|PX00159E12|2013	0.199531	0.0115842	4.04331	up	NA	NA
NONMMUT017839	0.260132	0.0280484	4.03154	up	NONMMUG011185.2	NA
gi|755481917|ref|XR_883220.1|	0.236075	0.0209892	4.03076	up	105245123	LOC105245123
NONMMUT064727	0.309547	0.0488227	3.9905	up	NONMMUG039969.2	NA
NONMMUT015985	0.205741	0.0134757	3.83307	up	NONMMUG010044.2	Gm15996
ri|F830218H21|PL00023N17|1465	0.304535	0.0464831	3.6437	up	NA	NA
ri|C330004M20|PX00075N03|978	0.181258	0.00801387	3.57296	up	NA	NA
NONMMUT017551	0.268448	0.0316735	3.53136	up	NONMMUG011003.1	NA
NONMMUT048799	0.275445	0.0346622	3.3588	up	NONMMUG030302.1	NA
gi|755476890|ref|XR_888718.1|	0.257174	0.0270598	3.34901	up	102641385	LOC102641385
NONMMUT009258	0.266503	0.0303009	3.34017	up	NONMMUG005752.2	NA
NONMMUT051538	0.117814	0.000917535	3.28309	up	NONMMUG031961.2	Gm15589
gi|755488062|ref|XR_396989.2|	0.310187	0.0494903	3.26413	up	102637744	Gm34476
gi|755489744|ref|XR_398082.2|	0.146512	0.0034818	3.24114	up	102635854	Gm33090
NONMMUT014609	0.159439	0.00480588	3.08211	up	NONMMUG009252.2	RP23-113F14.4
gi|755474998|ref|XR_401601.2|	0.260365	0.0282496	3.01728	up	102641942	LOC102641942
gi|755518798|ref|XR_869595.1|	0.247484	0.0240307	2.97313	up	102635298	Gm32675
gi|755508990|ref|XR_376606.2|	0.24997	0.0248035	2.93637	up	102640365	Gm36444
ri|5830460C12|PX00716O06|1290	0.146512	0.00348625	2.89558	up	NA	NA
NONMMUT033869	0.196673	0.0108498	2.86774	up	NONMMUG020801.2	NA
gi|755483235|ref|XR_393999.2|	0.129651	0.0016335	2.80606	up	102632807	Gm30785
gi|755564328|ref|XR_386837.2|	0.302439	0.0457407	2.75784	up	102635712	Gm32980
NONMMUT062324	0.117814	0.000888709	2.74124	up	NONMMUG038440.2	Gm16017
NONMMUT048097	0.130637	0.00195079	2.67162	up	NONMMUG029840.2	Gm12638
gi|755476802|ref|XR_888669.1|	0.146512	0.00339721	2.65928	up	105246762	LOC105246762
NONMMUT021807	0.146512	0.00343875	2.64564	up	NONMMUG013550.2	NA
NONMMUT051589	0.206551	0.0137844	2.63842	up	NONMMUG031991.2	NA
NONMMUT058949	0.140144	0.00259132	2.58451	up	NONMMUG036648.2	NA
ri|2700025J07|ZX00063E06|929	0.296922	0.0429154	2.5694	up	NA	NA
ri|4930403I12|PX00715E06|2416	0.268448	0.0319488	2.52948	up	NA	NA
NONMMUT070228	0.236033	0.0209339	2.52313	up	NONMMUG043473.1	NA
NONMMUT021337	0.298485	0.0437011	2.50593	up	NONMMUG013244.1	NA
ri|B930048B15|PX00164E08|960	0.241047	0.0222436	2.48602	up	NA	NA
ri|D930006K15|PX00200L24|2238	0.107337	0.000510071	2.48142	up	NA	NA
gi|755491488|ref|XR_864493.1|	0.285766	0.0389778	2.48044	up	102639275	Gm35624
ri|1110034E15|R000017B04|760	0.0991258	0.000328017	2.46747	up	NA	NA
NONMMUT004846	0.130637	0.00193128	2.46228	up	NONMMUG003119.1	NA
ri|9630014M24|PX00115J18|3865	0.127142	0.0013284	2.4605	up	NA	NA
NONMMUT060665	0.162466	0.00511982	2.46025	up	NONMMUG037702.2	Rpl23a-ps12
gi|755527625|ref|XR_879050.1|	0.303886	0.0462358	2.45879	up	105246809	LOC105246809
NONMMUT010936	0.219271	0.0172567	2.45544	up	NONMMUG006901.2	NA
gi|755491479|ref|XR_864550.1|	0.236662	0.021305	2.51963	down	102640301	LOC102640301
gi|755567947|ref|XR_882455.1|	0.257405	0.0271953	2.16662	down	102641068	LOC102641068
NONMMUT007052	0.119758	0.00106735	2.04177	down	NONMMUG004521.2	NA
NONMMUT044052	0.129651	0.00166242	2.8655	down	NONMMUG027179.1	NA
NONMMUT039273	0.140392	0.00265927	2.12408	down	NONMMUG024270.2	NA
NONMMUT039818	0.22534	0.0186134	2.35015	down	NONMMUG024632.2	Gm14047
NONMMUT056482	0.279582	0.0363248	2.36677	down	NONMMUG035078.2	NA
NONMMUT003105	0.109876	0.000708471	3.87863	down	NONMMUG002006.2	NA
gi|755496223|ref|XR_865789.1|	0.143714	0.00299964	2.5485	down	105244030	LOC105244030
gi|755489240|ref|XR_397790.2|	0.129651	0.00166283	2.06267	down	102638022	Gm34690
gi|755514516|ref|XR_868570.1|	0.178357	0.00752631	2.94785	down	105244788	LOC105244788
NONMMUT031747	0.117814	0.00087529	4.01482	down	NONMMUG019526.2	NA
gi|755485532|ref|XR_874359.1|	0.160903	0.00501155	2.44647	down	105245685	LOC105245685
gi|342187200|ref|NR_040681.1|	0.267777	0.031101	2.02456	down	69999	1700027F09Rik
NONMMUT010036	0.306121	0.047362	2.06005	down	NONMMUG006290.2	NA
NONMMUT071152	0.20382	0.0128203	2.27806	down	NONMMUG044066.2	NA
ri|A030005E02|PX00063G19|1202	0.140392	0.00274641	2.03367	down	NA	NA
ri|C030023J22|PX00074B12|2674	0.301664	0.04504	2.06656	down	NA	NA
NONMMUT053245	0.296922	0.0429489	2.69118	down	NONMMUG033073.2	NA
gi|755484403|ref|XR_394497.2|	0.279682	0.0363714	2.41106	down	102631736	Gm30001
NONMMUT009776	0.216827	0.0163569	2.34692	down	NONMMUG006125.2	4933405E24Rik
gi|755482039|ref|XR_392862.2|	0.158116	0.00457651	2.11933	down	102636999	Gm33916
NONMMUT039902	0.202095	0.0122273	2.16578	down	NONMMUG024694.2	NA
gi|755474984|ref|XR_887508.1|	0.0991258	0.000261464	2.2879	down	105247604	LOC105247604
NONMMUT026812	0.27177	0.033343	2.03285	down	NONMMUG016620.2	Gm15638
NONMMUT006946	0.249756	0.0246424	3.32925	down	NONMMUG004468.2	NA
NONMMUT066157	0.140392	0.00275617	3.5759	down	NONMMUG040943.2	NA
NONMMUT031979	0.284905	0.0386393	2.23379	down	NONMMUG019663.2	NA
NONMMUT027008	0.144363	0.00315067	2.28783	down	NONMMUG016746.2	NA
NONMMUT033263	0.165957	0.00596322	2.38678	down	NONMMUG020470.2	NA
gi|755470965|ref|XR_885493.1|	0.263098	0.0290301	2.43934	down	102634275	Gm29539
NONMMUT037993	0.172826	0.00677955	2.26227	down	NONMMUG023455.2	Gm14426
NONMMUT009598	0.279123	0.0361819	2.1095	down	NONMMUG006004.2	NA
NONMMUT058739	0.117814	0.000954566	2.84358	down	NONMMUG036518.2	NA
NONMMUT048146	0.224415	0.018352	2.94785	down	NONMMUG029859.2	NA
NONMMUT071921	0.158343	0.00462651	2.0672	down	NONMMUG044567.2	NA
ri|B930093F09|PX00726G07|1693	0.15331	0.00424758	2.36176	down	NA	NA
ri|K430334O09|PL00175E05|2289	0.207602	0.0140177	2.66176	down	NA	NA
NONMMUT039983	0.267777	0.0311061	2.26647	down	NONMMUG024745.1	NA
gi|755486187|ref|XR_877336.1|	0.201387	0.0120201	3.58336	down	105246411	LOC105246411
NONMMUT002917	0.20382	0.0129511	2.31619	down	NONMMUG001897.2	RP23-393I12.2
gi|755549612|ref|XR_874680.1|	0.235049	0.0207868	2.03363	down	105245773	LOC105245773
NONMMUT053942	0.260278	0.0281638	2.08303	down	NONMMUG033437.2	NA
NONMMUT049929	0.217062	0.0164793	2.07402	down	NONMMUG030916.2	Gm13257
NONMMUT006271	0.143714	0.00308584	2.06011	down	NONMMUG004034.2	NA
NONMMUT005919	0.217715	0.0167085	3.01567	down	NONMMUG003822.1	NA
NONMMUT025282	0.302041	0.0451562	2.30074	down	NONMMUG015649.2	NA
ri|C230017L24|PX00174M06|1988	0.182189	0.00824274	2.64542	down	NA	NA
NONMMUT022443	0.151238	0.0039683	2.29348	down	NONMMUG013839.2	NA
NONMMUT021015	0.18562	0.00918923	2.158	down	NONMMUG013045.2	NA

## Sheet: mRNAs in stomach, AM vs. NC
Probe name	P-value (Corr)	P-value	FC (abs)	Regulation	Gene symbol
A_55_P2046563	0.571411	0.00728649	12.9635	up	Cym
A_55_P2135153	0.412772	0.000431761	12.3818	up	Obp2a
A_55_P1984830	0.594314	0.0118278	10.2703	up	Fgl1
A_52_P294510	0.605468	0.024577	8.81465	up	Fgl1
A_55_P2004447	0.622243	0.0322883	5.1871	up	Fgl1
A_55_P2269819	0.623406	0.0440356	4.60182	up	Fam107a
A_55_P2024155	0.623406	0.0393146	4.38878	up	Zbtb16
A_55_P1982239	0.623406	0.0351345	4.02485	up	Ctrb1
A_55_P2013760	0.574703	0.00834906	3.83577	up	Slc39a14
A_55_P2394490	0.623406	0.0333558	3.51997	up	Slc16a7
A_51_P418901	0.60815	0.0263616	3.17472	up	Prss2
A_55_P2051094	0.393783	0.000245395	3.15619	up	Rorc
A_51_P275697	0.594314	0.0140144	3.14363	up	Fam101b
A_51_P282760	0.561168	0.00496357	3.06989	up	Per2
A_66_P105801	0.594314	0.0119327	2.99021	up	Igf1r
A_52_P377160	0.541725	0.00311367	2.97171	up	Galnt6
A_55_P2131642	0.571411	0.00737446	2.95637	up	Trim50
A_52_P374897	0.623406	0.0419294	2.92614	up	Arg2
A_52_P661071	0.541725	0.0032015	2.85812	up	Snhg3
A_51_P279038	0.556988	0.00482134	2.85056	up	Ppargc1a
A_55_P2065899	0.622243	0.031398	2.84066	up	Sebox
A_55_P1973941	0.607912	0.0252537	2.81733	up	Slc7a5
A_52_P116628	0.623406	0.0420053	2.81628	up	8430419L09Rik
A_52_P573552	0.541725	0.00318566	2.80235	up	Trib1
A_52_P161237	0.623406	0.0340214	2.78311	up	Cpa1
A_65_P19780	0.604617	0.0198665	2.76062	up	Klf9
A_52_P390944	0.604617	0.0172758	2.76016	up	Chst3
A_52_P586944	0.594327	0.0143588	2.69191	up	Bmpr1b
A_55_P2270437	0.60815	0.025941	2.67518	up	4930528J11Rik
A_55_P2078710	0.623406	0.0338742	2.66195	up	Morc4
A_52_P799815	0.571361	0.00596826	2.65157	up	Tmem171
A_51_P135268	0.519126	0.00245378	2.63933	up	Corin
A_52_P24631	0.620116	0.030494	2.61275	up	Azin1
A_52_P97221	0.62335	0.0331909	2.58881	up	Bicd1
A_66_P113599	0.594314	0.0115282	2.58762	up	Prss23os
A_65_P20167	0.519126	0.00242999	2.57084	up	Hyou1
A_55_P1957213	0.571361	0.00660569	2.54751	up	3930401B19Rik
A_52_P624149	0.448531	0.00104539	2.53794	up	Hsp90b1
A_55_P1994942	0.604617	0.0212961	2.53237	up	Rorc
A_52_P184149	0.594314	0.0123805	2.51288	up	Mthfd2
A_51_P170946	0.412772	0.000518377	2.50801	up	Hnrnpm
A_51_P149455	0.623406	0.0428341	2.49185	up	Acadl
A_52_P398989	0.623406	0.0389162	2.48897	up	Cytip
A_51_P472274	0.623406	0.0490232	2.4796	up	Sox18
A_52_P466853	0.594314	0.0119366	2.47645	up	Bmyc
A_51_P158210	0.604617	0.0177102	2.45204	up	Mcm2
A_55_P2071566	0.571411	0.00712121	2.44014	up	Mettl14
A_55_P2096762	0.604617	0.0186623	2.43611	up	Arhgdig
A_51_P377376	0.608535	0.0268556	2.43059	up	Gnl3
A_51_P362161	0.519024	0.00221421	2.42892	up	Ubqln4
A_55_P2085142	0.623406	0.0476082	7.07015	down	Spp1
A_55_P2131725	0.594314	0.013206	5.92407	down	LOC100045026
A_55_P1988009	0.608535	0.0269778	5.54364	down	Gm3252
A_55_P2129467	0.588034	0.0100865	5.46692	down	4930555G01Rik
A_55_P1978018	0.594314	0.0116555	5.36899	down	Gm5795
A_55_P1958479	0.594314	0.0119842	5.30798	down	4930555G01Rik
A_55_P2060604	0.604617	0.0207699	5.25966	down	Gm5797
A_55_P2007839	0.623406	0.0376642	4.94266	down	4933402N22Rik
A_51_P147188	0.594314	0.0126193	4.91783	down	Olfr485
A_55_P2375880	0.623406	0.0380023	4.90009	down	2610027H17Rik
A_55_P2077664	0.603194	0.0155829	4.76122	down	Gm5458
A_55_P2036083	0.594314	0.0140151	4.70366	down	Gm5797
A_51_P341465	0.623406	0.0451973	4.60866	down	Csf2ra
A_55_P2054004	0.594314	0.0140317	4.53025	down	2610042L04Rik
A_55_P2030282	0.594314	0.0108685	4.50101	down	Gm3383
A_55_P2104716	0.623406	0.0496324	4.42492	down	D830030K20Rik
A_55_P1988010	0.623406	0.0432269	4.33712	down	Gm10406
A_55_P2103952	0.604617	0.0181242	4.29294	down	Gm3453
A_55_P1958480	0.594314	0.013222	4.26672	down	Gm3239
A_55_P1955442	0.60815	0.0266513	4.24216	down	Gm3696
A_55_P1992234	0.623406	0.0352922	4.1785	down	Slx
A_55_P2044541	0.623406	0.0422144	4.06626	down	4930555G01Rik
A_55_P2097384	0.623406	0.0485871	3.9694	down	Gm5796
A_51_P133684	0.594314	0.0133051	3.9041	down	Csrp3
A_55_P1998688	0.623406	0.0463127	3.66561	down	Gm2030
A_52_P576188	0.623406	0.0362	3.63645	down	AY358078
A_55_P2062861	0.605468	0.0245502	3.61211	down	Gm3099
A_55_P2175976	0.623406	0.0392845	3.49027	down	Vmn2r35
A_55_P2104689	0.623406	0.0488119	3.45322	down	Gm5795
A_55_P2169963	0.547131	0.00393535	3.31387	down	Gm13152
A_55_P2273959	0.623406	0.037378	3.128	down	G930009F23Rik
A_55_P1993475	0.623406	0.0346426	3.10179	down	Gm5168
A_55_P1983380	0.604617	0.0217352	2.93718	down	Gm2022
A_55_P1995924	0.623406	0.0391281	2.92859	down	Gm13157
A_55_P2021570	0.623406	0.0481319	2.88889	down	C87414
A_55_P2184493	0.594314	0.0120052	2.88871	down	Sp100
A_55_P1998471	0.571411	0.00728569	2.86688	down	S100a9
A_55_P1959072	0.622243	0.0311859	2.82778	down	Clec2e
A_55_P2290378	0.623406	0.042667	2.81313	down	AU019176
A_55_P2119548	0.594314	0.0114375	2.62595	down	Gm13298
A_55_P2137121	0.623406	0.0343517	2.59806	down	Sp140
A_51_P379750	0.60815	0.0267706	2.55601	down	Myoz1
A_55_P2368435	0.519024	0.00226001	2.55012	down	4930442G15Rik
A_52_P69558	0.571411	0.00784963	2.48419	down	Gm8221
A_52_P332788	0.623406	0.0436218	2.48309	down	LOC102639105
A_55_P2264762	0.608657	0.0273952	2.44949	down	4933407K13Rik
A_55_P2037235	0.604617	0.0184904	2.44607	down	Sp110
A_51_P425824	0.604617	0.0213569	2.44568	down	Fam132a
A_55_P2163238	0.541725	0.00299366	2.41193	down	Pglyrp3
A_55_P2169938	0.623406	0.0429835	2.40413	down	Gm13051

## Sheet: mRNAs in stomach, H-CP vs. AM
Table SII. List of the top 50 up- and downregulated lncRNAs and mRNAs between the AM and NC groups, and between the H-CP and AM groups in the stomach.
Probe name	P-value (Corr)	P-value	FC (abs)	Regulation	Gene symbol
A_55_P1960117	0.400729	0.00564034	4.66846	up	1190002N15Rik
A_51_P425824	0.466511	0.015191	3.41734	up	Fam132a
A_55_P1965616	0.360338	0.00150776	3.29431	up	1700019G17Rik
A_55_P2142695	0.332089	7.47716e-05	3.28532	up	E330014E10Rik
A_55_P2097478	0.520093	0.0298907	3.27264	up	Gda
A_55_P2058514	0.516602	0.0281598	3.23978	up	Gm20867
A_52_P7513	0.550545	0.0398286	3.23923	up	4932411N23Rik
A_66_P127161	0.484445	0.0186916	3.20846	up	Cyp2u1
A_52_P240712	0.413846	0.00836376	3.19215	up	Cml2
A_52_P116006	0.484445	0.0183243	2.9165	up	Gda
A_55_P2030194	0.55758	0.0442657	2.86382	up	Ifna5
A_55_P2157902	0.409953	0.00678163	2.85334	up	Igsf10
A_55_P2030077	0.54395	0.0373686	2.68795	up	Ifnab
A_51_P150710	0.460168	0.0140294	2.66363	up	Igj
A_51_P515605	0.513292	0.0261436	2.66185	up	Col3a1
A_55_P1985835	0.401807	0.00580294	2.64101	up	Dnase1
A_55_P2097219	0.345954	0.00112095	2.6088	up	Gbp2b
A_55_P2075393	0.558004	0.0451362	2.60278	up	Igkv6-20
A_55_P2052385	0.545639	0.0383245	2.59837	up	Gbp6
A_55_P2152164	0.517167	0.0285354	2.57647	up	LOC102640292
A_55_P2032608	0.437048	0.0104438	2.53398	up	1190002N15Rik
A_55_P2032081	0.437594	0.0110568	2.5154	up	Dbp
A_52_P265965	0.466985	0.0152913	2.49887	up	Trim36
A_55_P2007155	0.428817	0.00955242	2.48162	up	Akr1c14
A_51_P466886	0.466511	0.0151397	2.47454	up	Scoc
A_55_P2141058	0.332089	0.000680654	2.4307	up	Gm11128
A_52_P239086	0.554841	0.0414658	2.42689	up	Apol10a
A_55_P2000269	0.386794	0.00252274	2.42239	up	Slc36a1
A_55_P1977038	0.415928	0.00844892	2.42006	up	Cxcl9
A_55_P2003603	0.360338	0.00154854	2.39163	up	Slc2a7
A_52_P311297	0.401548	0.00570676	2.38235	up	Als2
A_51_P229655	0.396034	0.00448662	2.36211	up	Acsm5
A_55_P2060379	0.5595	0.0457833	2.33592	up	Col15a1
A_52_P199633	0.516602	0.027776	2.30033	up	Trim30d
A_55_P2101088	0.38315	0.00232517	2.27025	up	Slc5a11
A_51_P359570	0.484445	0.019193	2.23025	up	Ifit3
A_55_P2022812	0.489312	0.0202696	2.21213	up	Cyp4f17
A_51_P501554	0.513292	0.0259281	2.20968	up	Tm4sf20
A_52_P507214	0.417648	0.00877838	2.1732	up	Mmp9
A_55_P1990346	0.460168	0.0137525	2.16808	up	Adamdec1
A_51_P294807	0.404824	0.00600356	2.15113	up	Stom
A_51_P417701	0.396034	0.00385279	2.12681	up	Apaf1
A_52_P538390	0.50249	0.0231299	2.12551	up	Olfr165
A_51_P101375	0.514696	0.0268896	2.12046	up	St6gal1
A_55_P2057720	0.540048	0.0353584	2.11081	up	Zfp937
A_55_P1990633	0.484445	0.0189158	2.09122	up	Iigp1
A_55_P2040295	0.432569	0.00990505	2.08236	up	Ptp4a1
A_52_P20753	0.466464	0.0150356	2.07482	up	Edn3
A_55_P2055257	0.513292	0.0252421	2.07301	up	Maoa
A_52_P156452	0.360338	0.0015535	2.06733	up	Cmah
A_51_P418901	0.332089	0.000394202	462.795	down	Prss2
A_55_P1996314	0.332089	0.000277478	419.451	down	Amy2a5
A_52_P584279	0.357489	0.00127654	380.384	down	Pnlip
A_55_P2101290	0.386794	0.00266133	345.026	down	Try4
A_55_P2095513	0.364465	0.00170601	329.539	down	Try5
A_51_P504538	0.36537	0.00189174	313.109	down	Cela2a
A_55_P2013555	0.332089	0.000323733	309.109	down	Prss1
A_55_P2042860	0.332089	0.000443012	303.976	down	Gm5409
A_55_P1982239	0.332089	0.000721743	291.793	down	Ctrb1
A_55_P2139402	0.332089	0.000920606	247.992	down	Amy2a5
A_55_P2159249	0.332089	0.000357336	217.104	down	Gm5771
A_51_P242205	0.409953	0.00668122	149.666	down	Cel
A_55_P1983418	0.332089	0.000323997	139.091	down	Amy1
A_55_P2053561	0.405602	0.00611819	137.339	down	Gm13011
A_51_P391934	0.400729	0.00562373	124.882	down	Cpb1
A_51_P136781	0.430147	0.00967585	123.592	down	Pnliprp1
A_55_P2013554	0.349968	0.00117757	123.314	down	Prss1
A_52_P161237	0.393823	0.00342326	117.316	down	Cpa1
A_52_P578634	0.413719	0.00817552	107.038	down	Cela1
A_55_P2064303	0.413719	0.00813682	102.336	down	Ctrc
A_51_P280893	0.437293	0.0104633	101.216	down	Pla2g1b
A_55_P1965882	0.489312	0.0203041	64.0656	down	Gp2
A_52_P320261	0.50249	0.0230524	56.3708	down	Cpa2
A_55_P1965881	0.519013	0.0291491	51.1574	down	Gp2
A_55_P1963639	0.514925	0.0271283	34.017	down	Sycn
A_51_P177491	0.480137	0.0177861	28.6861	down	Ctrl
A_55_P2063261	0.568969	0.0484091	23.5659	down	2210010C04Rik
A_55_P2042535	0.508833	0.024477	23.2009	down	Cela3b
A_55_P2004031	0.561022	0.0460745	17.5283	down	Ctrc
A_51_P314669	0.517001	0.028507	12.3012	down	Pnliprp2
A_55_P2015877	0.54395	0.0376166	12.1461	down	Clps
A_55_P2015878	0.542416	0.0369971	12.1247	down	Clps
A_55_P2024155	0.336785	0.00108075	9.39943	down	Zbtb16
A_51_P333549	0.55758	0.0437884	8.84138	down	Reg2
A_55_P2013751	0.393823	0.00341735	4.85382	down	Tsga10
A_55_P2044684	0.413719	0.00736003	4.80095	down	Rsph1
A_65_P19832	0.549522	0.0395513	4.68022	down	Ttr
A_55_P2038358	0.396034	0.00380956	4.45142	down	Acot1
A_52_P51078	0.485332	0.0196081	4.11522	down	Ctsh
A_51_P100309	0.386794	0.00308664	3.90591	down	Oprm1
A_55_P1992582	0.413719	0.00758952	3.902	down	Hmgcs2
A_51_P410228	0.413719	0.0075097	3.83436	down	Fancd2os
A_55_P2120596	0.445524	0.0118305	3.83011	down	BC018473
A_55_P2013586	0.386794	0.00258386	3.77657	down	Prss8
A_52_P525183	0.386794	0.00299326	3.71086	down	Acot2
A_55_P1952399	0.54395	0.0374927	3.57628	down	Cyp4a31
A_55_P2025735	0.489347	0.0207885	3.56743	down	Adam7
A_55_P2109033	0.408176	0.00661265	3.55419	down	Hmgcs2
A_55_P2017929	0.556481	0.0425014	3.46546	down	Clu
A_55_P2092030	0.549944	0.0397333	3.46079	down	Cyp4a10
